# Supplementary material for: Crystal structure and electrical characterisation of Bi2NbO5F: an Aurivillius oxide fluoride
Source: Royal Society of Chemistry journal article supplement (doi:10.1039/b613970a), 2007-01-01
Supplement: b613970a.pdf [file b613970a.pdf]

## Supplementary Data B613970A

### Crystal structure and electrical characterisation of Bi<sub>2</sub>NbO<sub>5</sub>F:

#### An Aurivillius oxide fluoride

E. E. McCabe,<sup>a</sup> I. P. Jones,<sup>b</sup> D. Zhang,<sup>b</sup> N. C. Hyatt<sup>c</sup> and C. Greaves\*<sup>a</sup>

<sup>a</sup>School of Chemistry, University of Birmingham, Birmingham B15 2TT

<sup>b</sup>Materials and Metallurgy Department, University of Birmingham, Birmingham B15 2TT

<sup>c</sup>Department of Engineering Materials, The University of Sheffield, Sir Robert Hadfield Building, Mappin Street, Sheffield, S1 3JD

Bond Valence Sum calculations for Bi<sup>3+</sup> and Nb<sup>5+</sup> cation sites in Bi<sub>2</sub>NbO<sub>5</sub>F from refinements of NPD data collected at 295 K in space groups *I4/mmm* and *Aea2*

|    |          |             | <i>I4/mmm</i> | <i>Aea2</i> |
|----|----------|-------------|---------------|-------------|
| Bi | O(1) = F | <b>2.89</b> |               | <b>3.00</b> |
|    | O(2) = F | 2.70        |               | 2.91        |
|    | O(3) = F | 2.45        |               | 2.55        |
| Nb | O(1) = F | 5.66        |               | 4.48        |
|    | O(2) = F | 4.72        |               | <b>4.89</b> |
|    | O(3) = F | <b>5.24</b> |               | 5.32        |
| X  | O(1) = F | 1.59        |               | 1.49        |
|    | O(2) = F | <b>1.10</b> |               | <b>1.12</b> |
|    | O(3) = F | 1.85        |               | 1.89        |

Bond Valence Sum calculations for Bi<sup>3+</sup> and Nb<sup>5+</sup> cation sites in Bi<sub>2</sub>NbO<sub>5</sub>F from refinements of NPD data collected at 295 K in space group *Pca2*<sub>1</sub>

|            | Anion Site Occupies by F |      |      |      |      |      |             |      |      |
|------------|--------------------------|------|------|------|------|------|-------------|------|------|
|            | O(1)                     | O(2) | O(3) | O(4) | O(5) | O(6) | ap.         | eq.  | fl.  |
| Bi(1)      | 2.98                     | 2.98 | 2.52 | 2.98 | 2.97 | 2.86 | 2.92        | 2.75 | 2.98 |
| Bi(2)      | 3.09                     | 2.74 | 3.22 | 3.20 | 3.21 | 3.22 | 3.10        | 2.93 | 3.15 |
| average Bi | 3.04                     | 2.86 | 2.87 | 3.09 | 3.09 | 3.04 | <b>3.01</b> | 2.84 | 3.07 |
| Nb         | 5.03                     | 5.26 | 5.26 | 4.91 | 4.80 | 5.09 | <b>5.06</b> | 5.26 | 4.86 |
